# Supplementary material for: Supramolecular zwitterions based on a novel boronic acid–squarate dianion synthon
Source: Royal Society of Chemistry journal article supplement (doi:10.1039/c9ce00367c), 2019-01-01
Supplement: c9ce00367c1.pdf [file c9ce00367c1.pdf]

# Supramolecular Zwitterions Based on a Novel Boronic Acid-Squarate Dianion Synthons

## ELECTRONIC SUPPLEMENTARY INFORMATION

Luca Fornasari,<sup>1</sup> Simone D'Agostino,<sup>1</sup> Dario Braga<sup>\*a</sup>

<sup>a</sup> Dipartimento di Chimica G. Ciamician, Università di Bologna, Via F. Selmi 2, 40126 Bologna, Italy.

### Content:

---

|                                                                      |       |
|----------------------------------------------------------------------|-------|
| Crystal data and refinement details.....                             | ESI-2 |
| Ortep drawing and numbering schemes.....                             | ESI-3 |
| Electron density difference map of [SQ(1BAH) <sub>2</sub> ]·bpy..... | ESI-5 |
| X-ray Powder Diffraction patterns.....                               | ESI-6 |
| ATR-FTIR spectra.....                                                | ESI-8 |

---

## CRYSTAL DATA AND REFINEMENT DETAILS

**TABLE ESI-1.** Crystallographic data for [SQ(1BAH)<sub>2</sub>]<sub>2</sub>·2H<sub>2</sub>O, [SQ(2BAH)<sub>2</sub>]<sub>2</sub>·H<sub>2</sub>O, [SQ(3BAH)<sub>2</sub>]<sub>2</sub>·2H<sub>2</sub>O, and [SQ(4pyBAH)<sub>2</sub>]<sub>2</sub>·bpy.

|                                                   | [SQ(1BAH) <sub>2</sub> ] <sub>2</sub> ·2H <sub>2</sub> O                      | [SQ(2BAH) <sub>2</sub> ] <sub>2</sub> ·H <sub>2</sub> O                      | [SQ(3BAH) <sub>2</sub> ] <sub>2</sub> ·2H <sub>2</sub> O                      | [SQ(1BAH) <sub>2</sub> ] <sub>2</sub> ·bpy                                   |
|---------------------------------------------------|-------------------------------------------------------------------------------|------------------------------------------------------------------------------|-------------------------------------------------------------------------------|------------------------------------------------------------------------------|
| <b>Empirical formula</b>                          | C <sub>14</sub> H <sub>18</sub> B <sub>2</sub> N <sub>2</sub> O <sub>10</sub> | C <sub>14</sub> H <sub>16</sub> B <sub>2</sub> N <sub>2</sub> O <sub>9</sub> | C <sub>26</sub> H <sub>26</sub> B <sub>2</sub> N <sub>2</sub> O <sub>10</sub> | C <sub>24</sub> H <sub>22</sub> B <sub>2</sub> N <sub>4</sub> O <sub>8</sub> |
| <b>Formula weight</b>                             | 395.92                                                                        | 377.91                                                                       | 548.11                                                                        | 516.07                                                                       |
| <b>Temperature/K</b>                              | 250                                                                           | 300                                                                          | 300                                                                           | 300                                                                          |
| <b>Crystal system</b>                             | monoclinic                                                                    | monoclinic                                                                   | monoclinic                                                                    | monoclinic                                                                   |
| <b>Space group</b>                                | I2/m                                                                          | P2 <sub>1</sub> /c                                                           | P2 <sub>1</sub> /c                                                            | C2/m                                                                         |
| <b>a/Å</b>                                        | 3.7455(3)                                                                     | 10.5211(5)                                                                   | 3.9208(4)                                                                     | 12.3874(6)                                                                   |
| <b>b/Å</b>                                        | 10.5330(6)                                                                    | 21.0309(9)                                                                   | 10.4450(9)                                                                    | 10.7643(4)                                                                   |
| <b>c/Å</b>                                        | 21.5313(12)                                                                   | 7.6551(4)                                                                    | 29.717(3)                                                                     | 8.7610(4)                                                                    |
| <b>α/°</b>                                        | 90                                                                            | 90                                                                           | 90                                                                            | 90                                                                           |
| <b>β/°</b>                                        | 94.556(6)                                                                     | 99.368(5)                                                                    | 90.340(9)                                                                     | 98.765(5)                                                                    |
| <b>γ/°</b>                                        | 90                                                                            | 90                                                                           | 90                                                                            | 90                                                                           |
| <b>Volume/Å<sup>3</sup></b>                       | 846.75(10)                                                                    | 1671.24(14)                                                                  | 1216.97(19)                                                                   | 1154.56(9)                                                                   |
| <b>Z</b>                                          | 2                                                                             | 4                                                                            | 2                                                                             | 2                                                                            |
| <b>ρ<sub>calc</sub>/cm<sup>3</sup></b>            | 1.553                                                                         | 1.502                                                                        | 1.496                                                                         | 1.484                                                                        |
| <b>μ/mm<sup>-1</sup></b>                          | 0.130                                                                         | 0.123                                                                        | 0.114                                                                         | 0.111                                                                        |
| <b>F(000)</b>                                     | 412.0                                                                         | 784.0                                                                        | 572.0                                                                         | 536.0                                                                        |
| <b>Crystal size/mm<sup>3</sup></b>                | 0.5 × 0.2 × 0.1                                                               | 0.2 × 0.2 × 0.05                                                             | 0.2 × 0.2 × 0.03                                                              | 0.2 × 0.1 × 0.1                                                              |
| <b>Radiation</b>                                  | MoKα (λ = 0.71073)                                                            | MoKα (λ = 0.71073)                                                           | MoKα (λ = 0.71073)                                                            | MoKα (λ = 0.71073)                                                           |
| <b>2θ range for data collection/°</b>             | 6.884 to 52.002                                                               | 6.432 to 58.442                                                              | 6.73 to 58.354                                                                | 6.54 to 58.042                                                               |
| <b>Reflections collected</b>                      | 2893                                                                          | 6685                                                                         | 4924                                                                          | 2546                                                                         |
| <b>Independent reflections</b>                    | 884 [R <sub>int</sub> = 0.0169, R <sub>sigma</sub> = 0.0161]                  | 3735 [R <sub>int</sub> = 0.0270, R <sub>sigma</sub> = 0.0549]                | 2712 [R <sub>int</sub> = 0.0287, R <sub>sigma</sub> = 0.0476]                 | 1388 [R <sub>int</sub> = 0.0189, R <sub>sigma</sub> = 0.0324]                |
| <b>Data/restraints/parameters</b>                 | 884/0/73                                                                      | 3735/0/251                                                                   | 2712/0/186                                                                    | 1388/0/95                                                                    |
| <b>Goodness-of-fit on F<sup>2</sup></b>           | 1.079                                                                         | 1.014                                                                        | 1.014                                                                         | 1.066                                                                        |
| <b>Final R indexes [I &gt;= 2σ (I)]</b>           | R <sub>1</sub> = 0.0375, wR <sub>2</sub> = 0.1024                             | R <sub>1</sub> = 0.0514, wR <sub>2</sub> = 0.1082                            | R <sub>1</sub> = 0.0574, wR <sub>2</sub> = 0.1387                             | R <sub>1</sub> = 0.0463, wR <sub>2</sub> = 0.1125                            |
| <b>Final R indexes [all data]</b>                 | R <sub>1</sub> = 0.0415, wR <sub>2</sub> = 0.1059                             | R <sub>1</sub> = 0.0960, wR <sub>2</sub> = 0.1298                            | R <sub>1</sub> = 0.0895, wR <sub>2</sub> = 0.1677                             | R <sub>1</sub> = 0.0601, wR <sub>2</sub> = 0.1199                            |
| <b>Largest diff. peak/hole / e Å<sup>-3</sup></b> | 0.24/-0.23                                                                    | 0.22/-0.23                                                                   | 0.26/-0.27                                                                    | 0.32/-0.23                                                                   |

ORTEP DRAWINGS AND NUMBERING SCHEMES

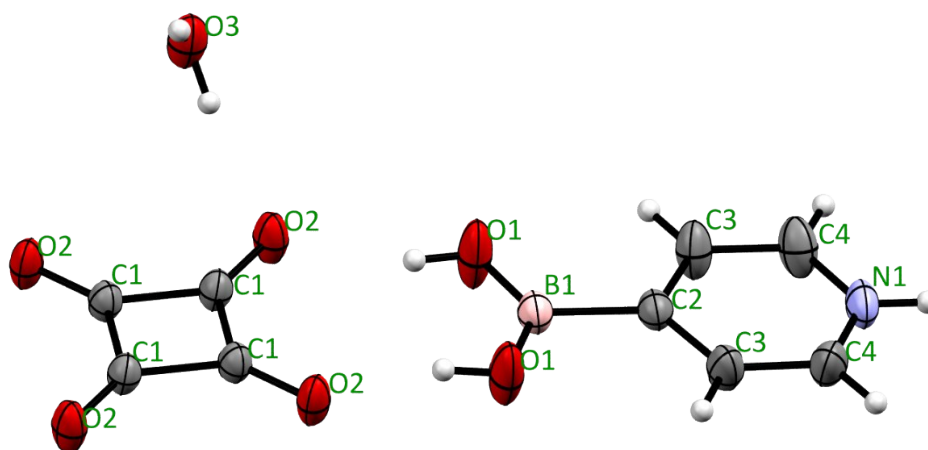

FIGURE ESI-1. Ortep drawing of  $[\text{SQ}(\text{1BAH})_2] \cdot 2\text{H}_2\text{O}$  (ellipsoids drawn at 50% probability)

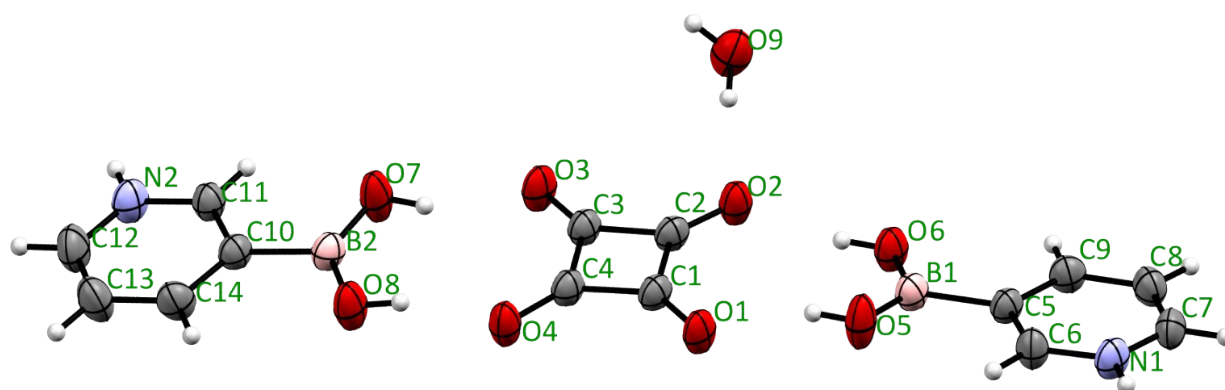

FIGURE ESI-2. Ortep drawing of  $[\text{SQ}(\text{2BAH})_2] \cdot \text{H}_2\text{O}$  (ellipsoids drawn at 50% probability)

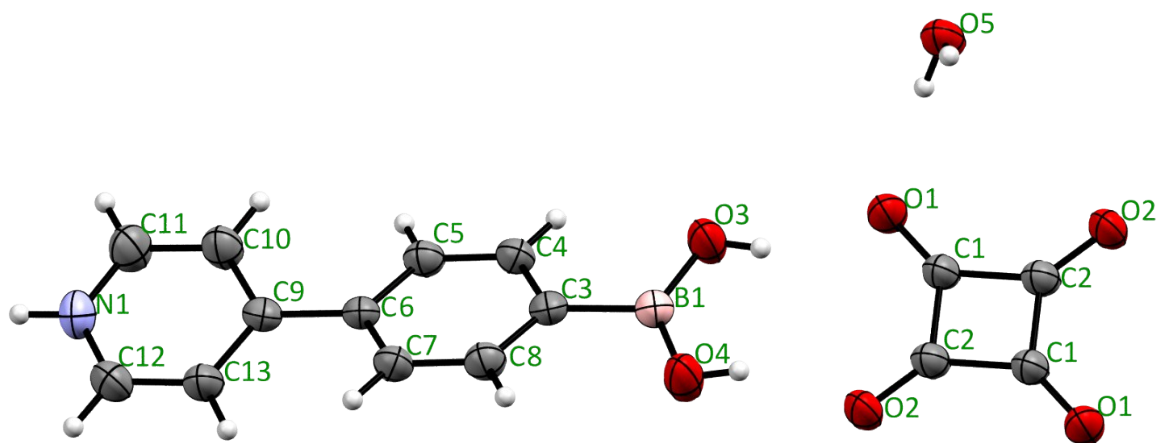

FIGURE ESI-3. Ortep drawing of  $[\text{SQ}(\text{3BAH})_2] \cdot 2\text{H}_2\text{O}$  (ellipsoids drawn at 50% probability)

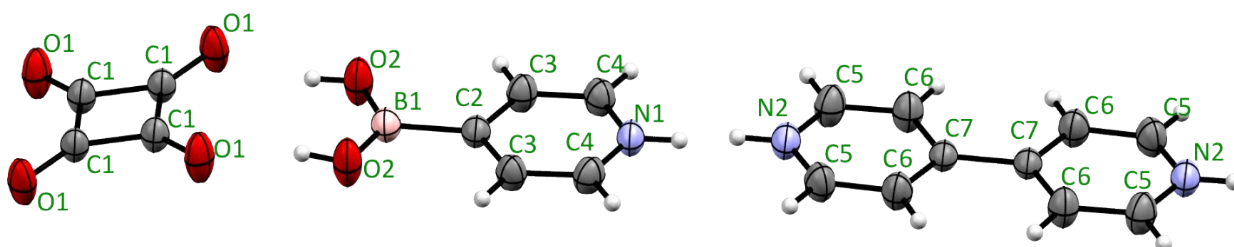

FIGURE ESI-4. Ortep drawing of  $[\text{SQ}(\text{1BAH})_2] \cdot \text{bpy}$  (ellipsoids drawn at 50% probability)

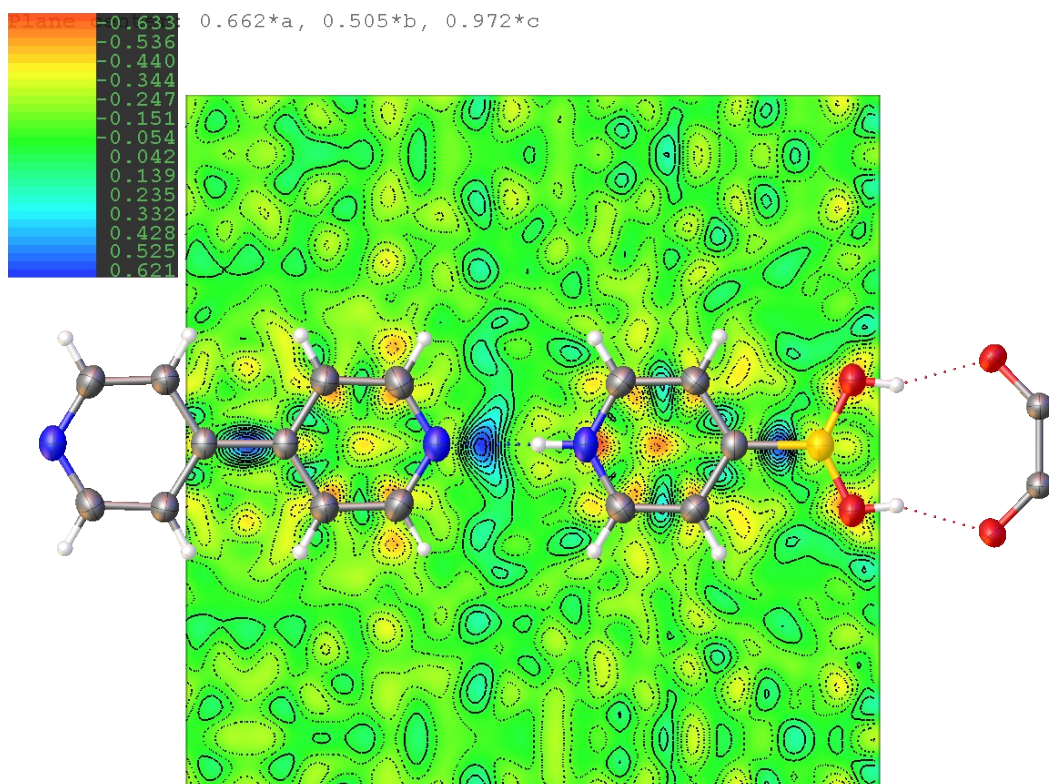

**Figure ESI-5.** Electron density difference map of [SQ(1BAH)<sub>2</sub>]<sub>2</sub>·bpy.

### X-RAY POWDER DIFFRACTION PATTERNS

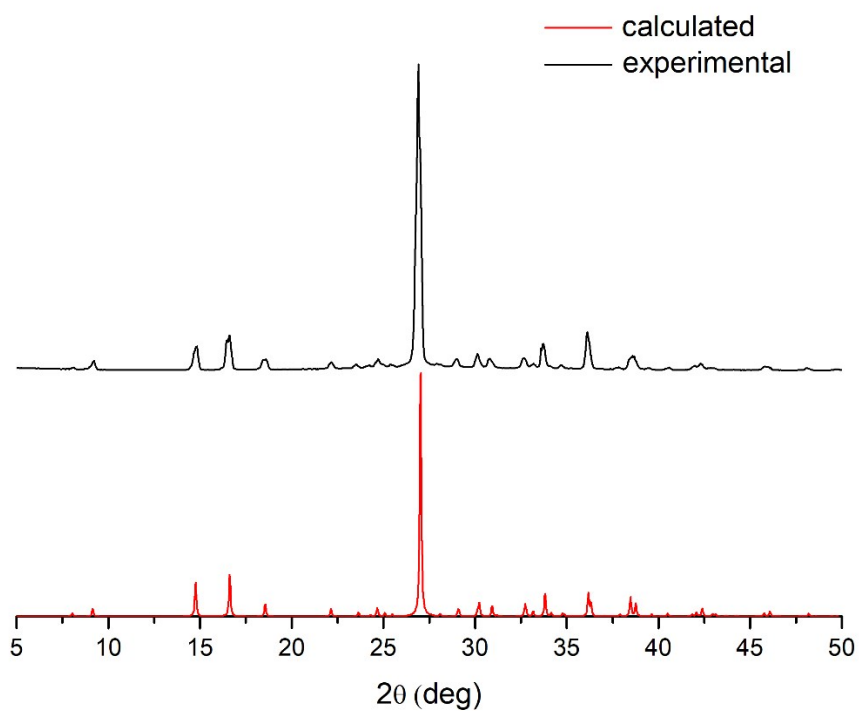

**FIGURE ESI-6.** Comparison between the experimental (black-line) and calculated (red-line) diffraction pattern of  $[\text{SQ}(\text{1BAH})_2] \cdot 2\text{H}_2\text{O}$ .

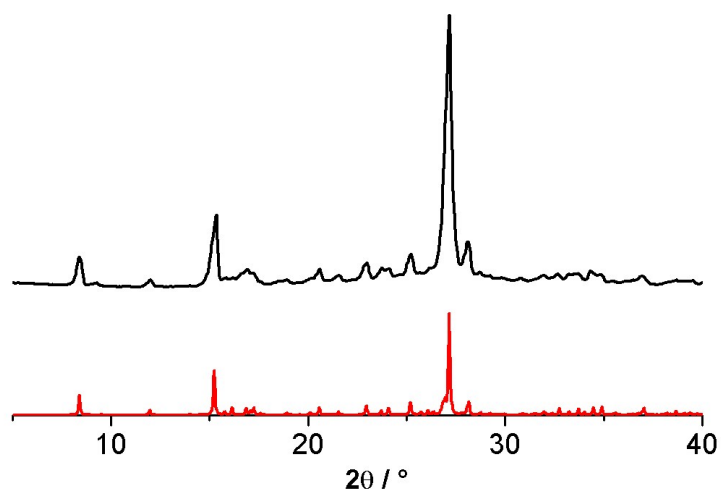

**FIGURE ESI-7.** Comparison between the experimental (black-line) and calculated (red-line) diffraction pattern of  $[\text{SQ}(\text{2BAH})_2] \cdot \text{H}_2\text{O}$ .

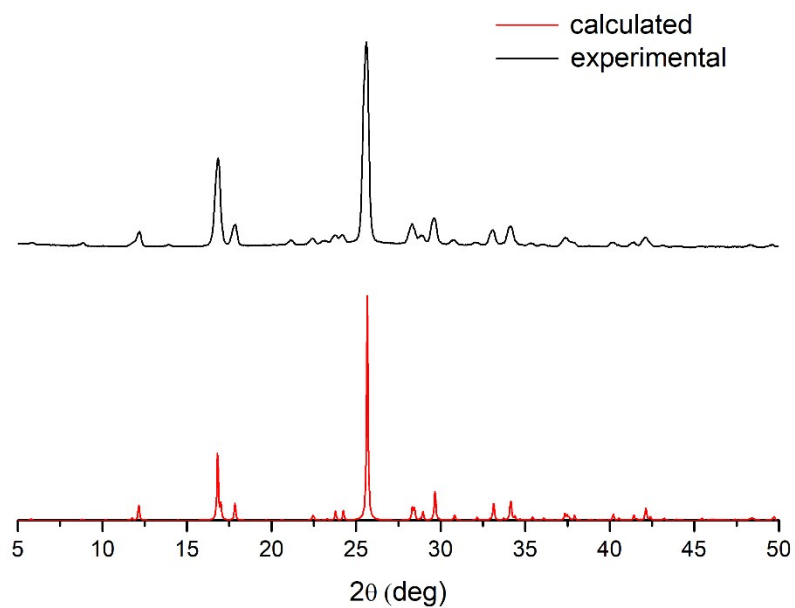

**FIGURE ESI-8.** Comparison between the experimental and calculated diffraction pattern of [SQ(3BAH)<sub>2</sub>]·H<sub>2</sub>O.

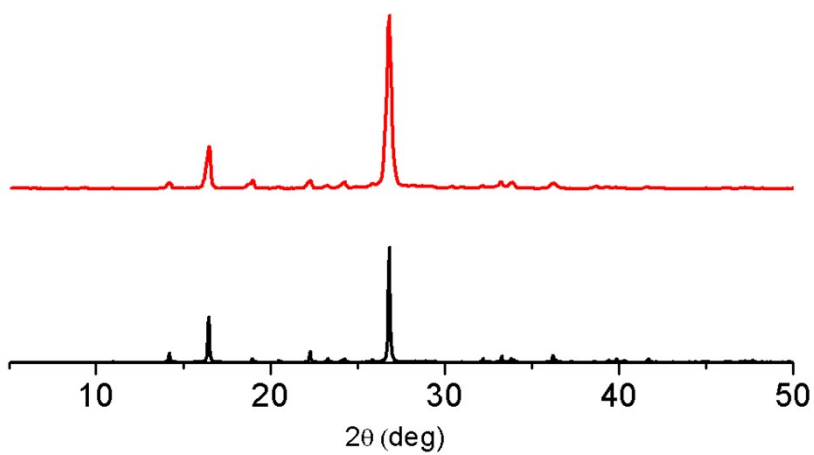

**FIGURE ESI-9.** Comparison between the experimental (red-line) and calculated (black-line) diffraction pattern of [SQ(1BAH)<sub>2</sub>]·bpy.

### ATR-FTIR SPECTRA

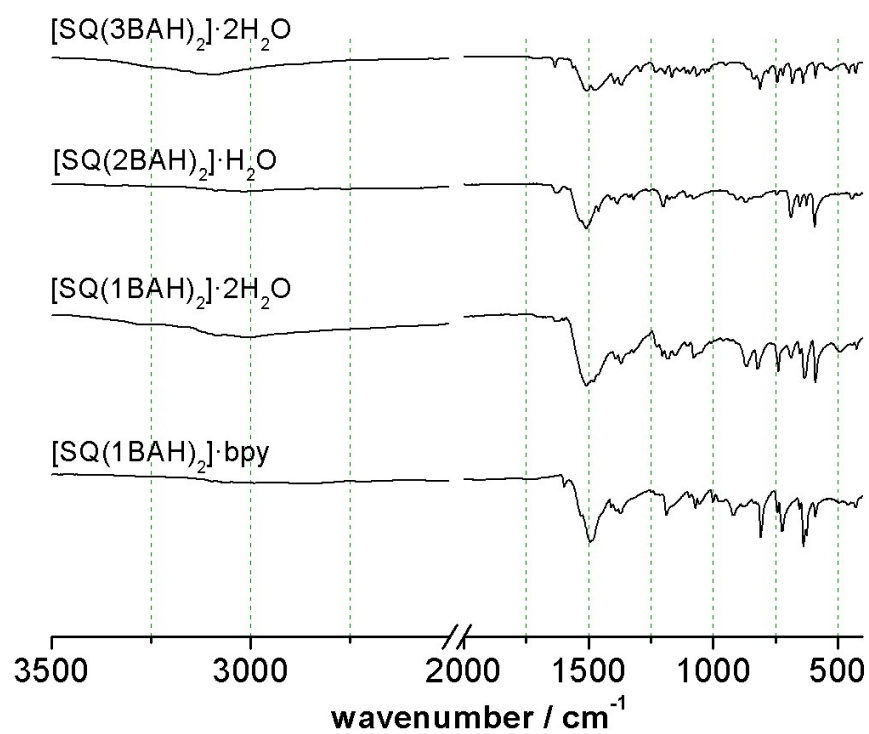

**Figure ESI-10.** ATR-FTIR spectra of compounds  $[\text{SQ}(\text{1BAH})_2] \cdot \text{bpy}$ ,  $[\text{SQ}(\text{1BAH})_2] \cdot 2\text{H}_2\text{O}$ ,  $[\text{SQ}(\text{2BAH})_2] \cdot \text{H}_2\text{O}$ , and  $[\text{SQ}(\text{3BAH})_2] \cdot 2\text{H}_2\text{O}$ .
